# Supplementary material
Source: PubMed Central journal article supplement (PMC6736757)
Supplement: NIHMS1537076-supplement-3.pdf [file NIHMS1537076-supplement-3.pdf]

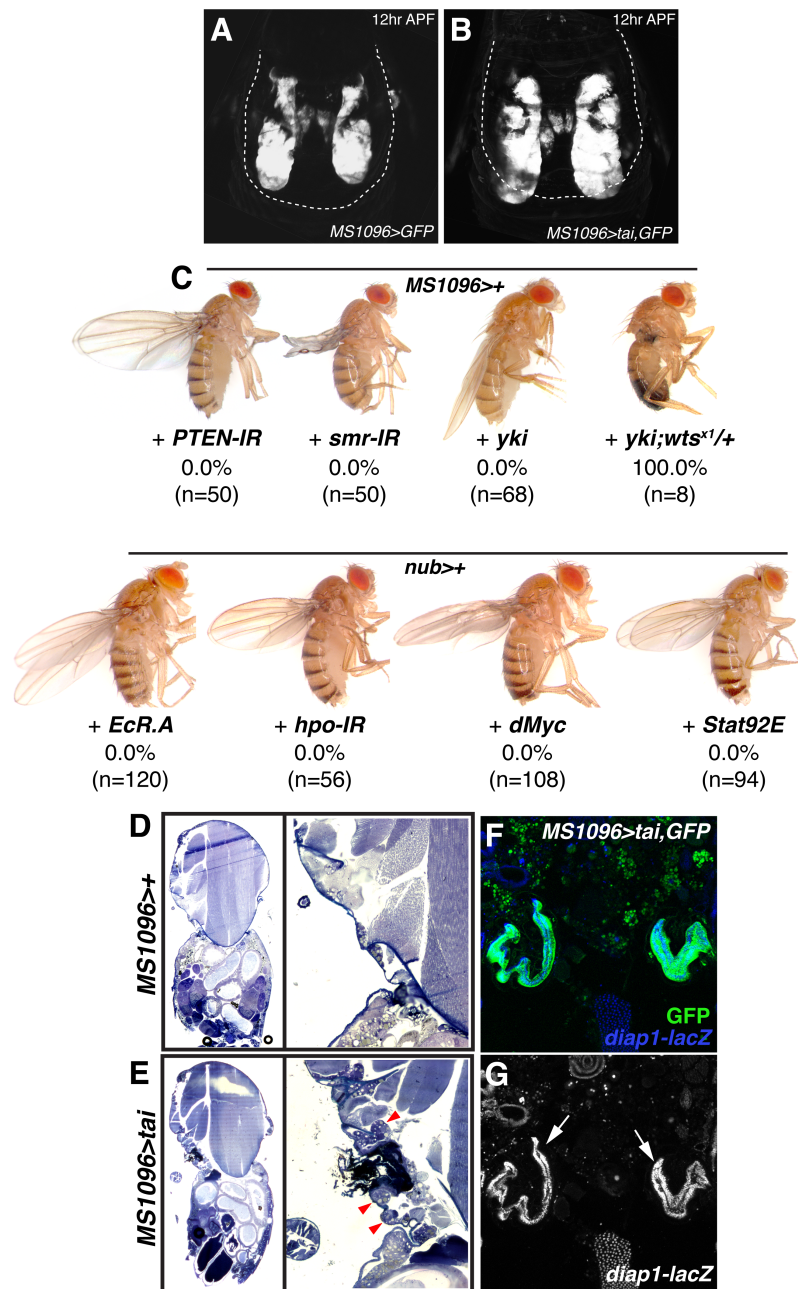

**Figure S1. Disc and wing phenotypes induced by *tai* and a panel of growth regulators. Related to Figure 1.** (A-B) 12hr APF pupal wing discs imaged through the pupal case of wild-type control and *MS1096>tai* animals. Dotted line indicates the edge of the operculum. (C) Overexpression or RNAi depletion of candidate factors using either the *MS1096* or *nubbin* Gal4 drivers. Percentage of embedded wingtips at eclosion and number of wings scored (n) are indicated. (D-E) Thin-sections of resin-embedded *MS1096>+* or *MS1096>tai* adult flies stained with toluidine blue. Red arrows in (E) indicate large vesicular cells near location of wing entry. (F-G) Cryosection of 18hr APF *MS1096>tai, GFP* animal stained with anti- $\beta$ gal (greyscale) to detect *diap1-lacZ* expression. Arrows denote embedded GFP (green) tissue that expresses *diap1-lacZ*.

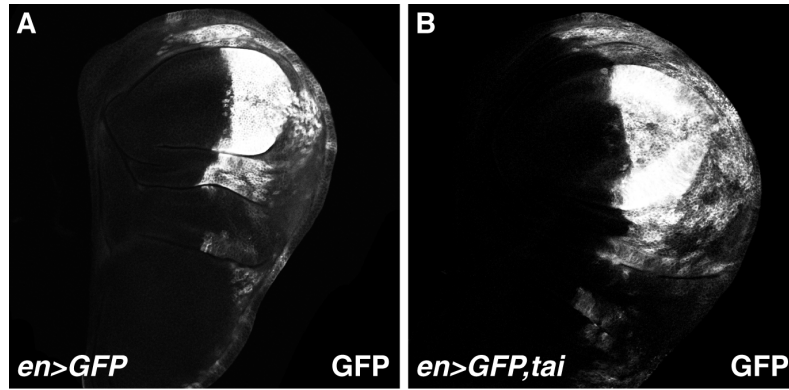

**Figure S2. Larval *en>tai* wing discs used for RNA-seq analysis are overgrown. Related to Figure 3.** To-scale images of control (A) *en>GFP* and (B) *en>GFP,tai* larval wing discs showing overgrowth of the posterior (GFP+) domain

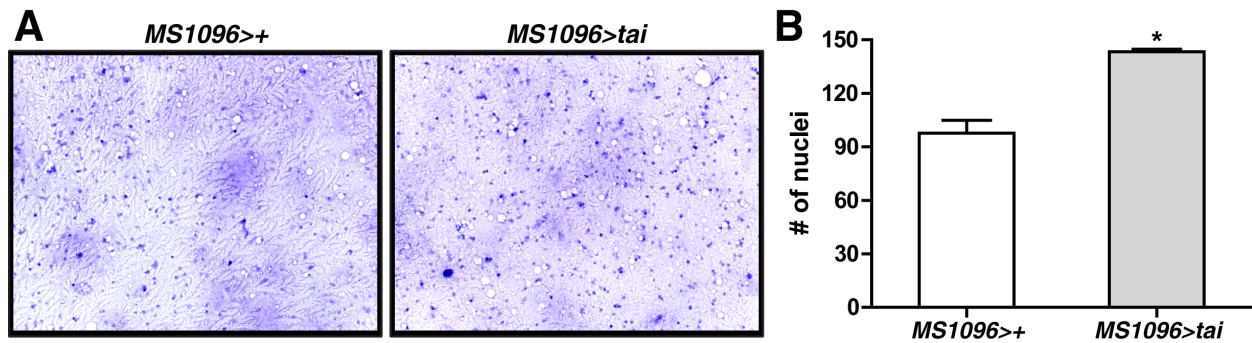

**Figure S3. *tai* expression in wing tissue increases hemocyte numbers. Related to Figure 4.** (A) Diff-quick™ staining (a modified Giemsa stain that highlights nuclei; refer to STAR methods section) of hemocytes from larval bleeds of control *MS1096>+* (left) and *MS1096>tai* (right) animals. (B) Quantification of hemocyte nuclei per field (n=7; \* p<0.05).

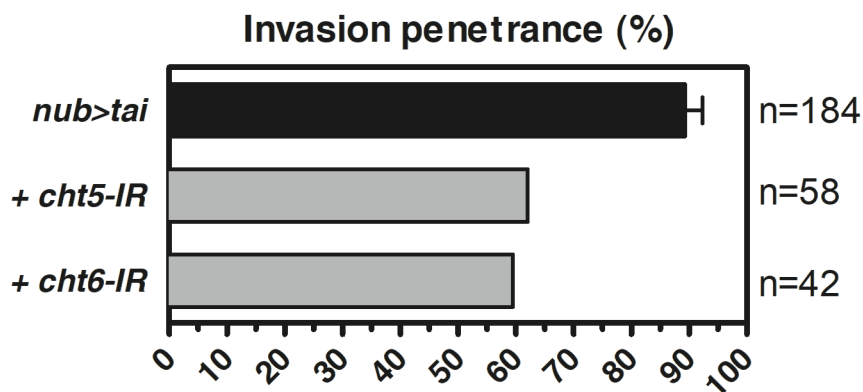

**Figure S4. Suppression by chitinase RNAi expression in *nub>tai* wing cells. Related to Figure 5.** Penetrance (%) of *nub>tai* wing invasion in the background of *UAS-RNAi* lines to *cht5* or *cht6* (n=number of wings counted). Control *nub>tai* is indicated by black fill.

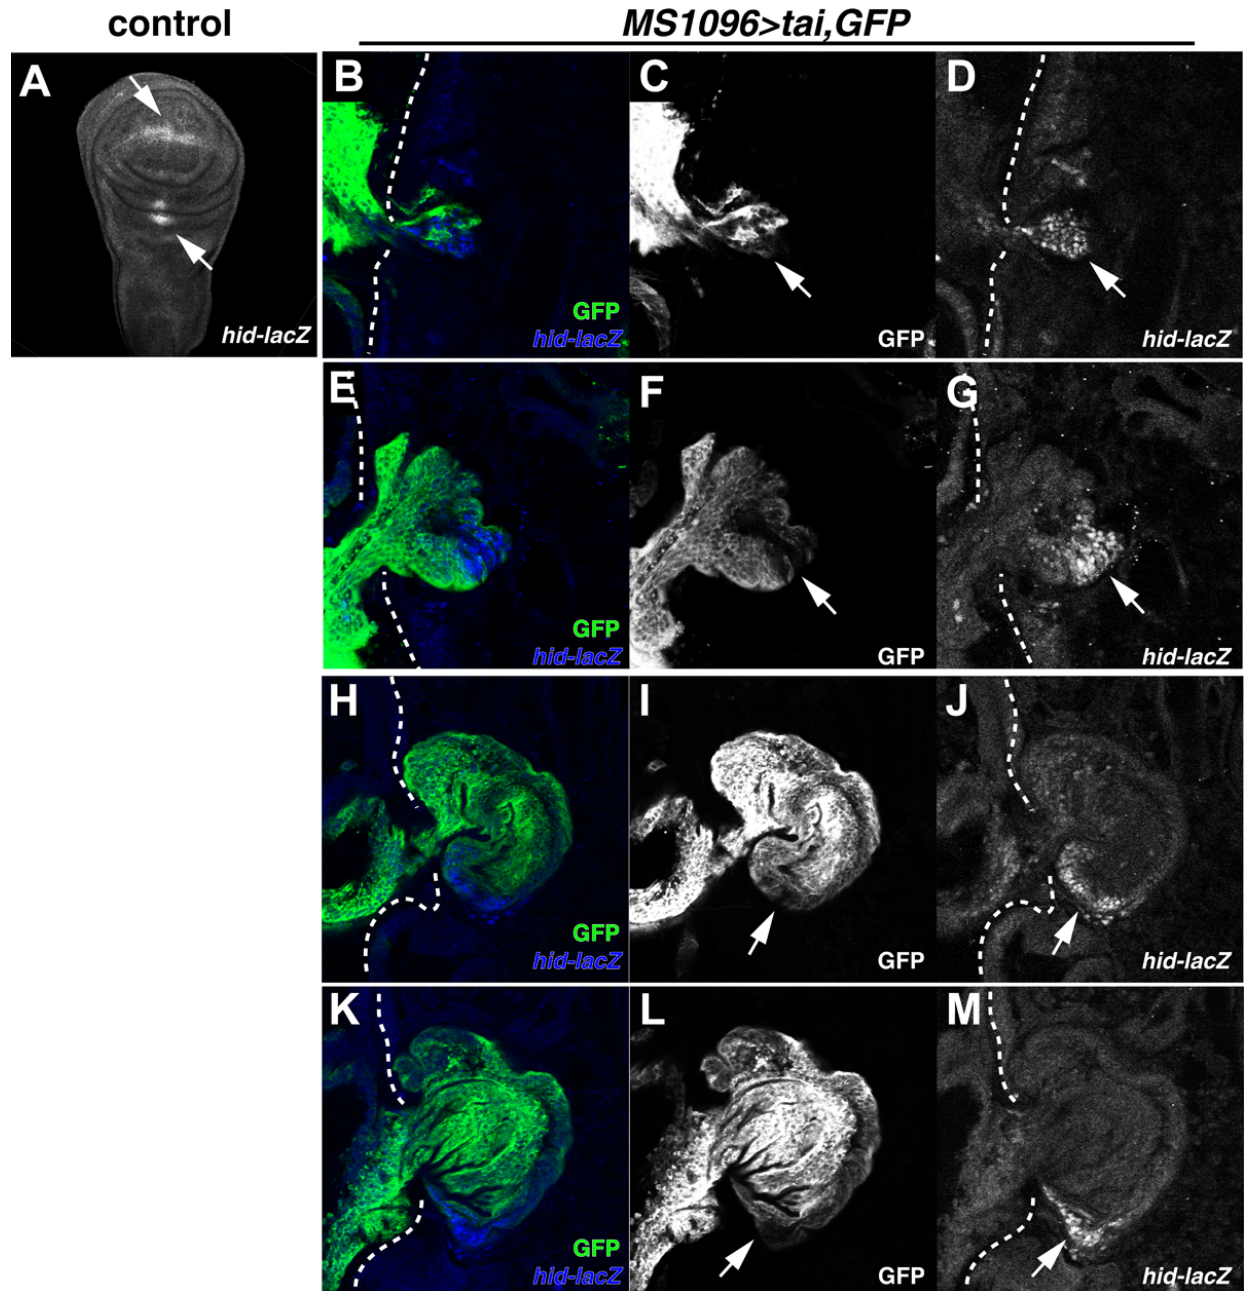

**Figure S5. *hid-lacZ* marks cells at the tip of invading wing tissue. Related to Figure 6.** (A) Confocal image of control *MS1096>+* larval wing disc stained with anti- $\beta$ gal (greyscale) to detect expression of *hid-lacZ*. Arrows denote *hid-lacZ*-positive cells located along the DV margin in the pouch (top) and in the dorsal hinge (bottom). (B-M) Cryosections from *MS1096>tai,GFP, hid-lacZ* animals imaged for GFP fluorescence (green in B,E,H,K; greyscale in C,F,I,L) and anti- $\beta$ gal (blue in B,E,H,K; greyscale in D,G,J,M) showing position of *hid-lacZ* expressing cells (arrows) during sequential stages of invasion into the thorax. Dotted line indicates the thoracic cuticle.

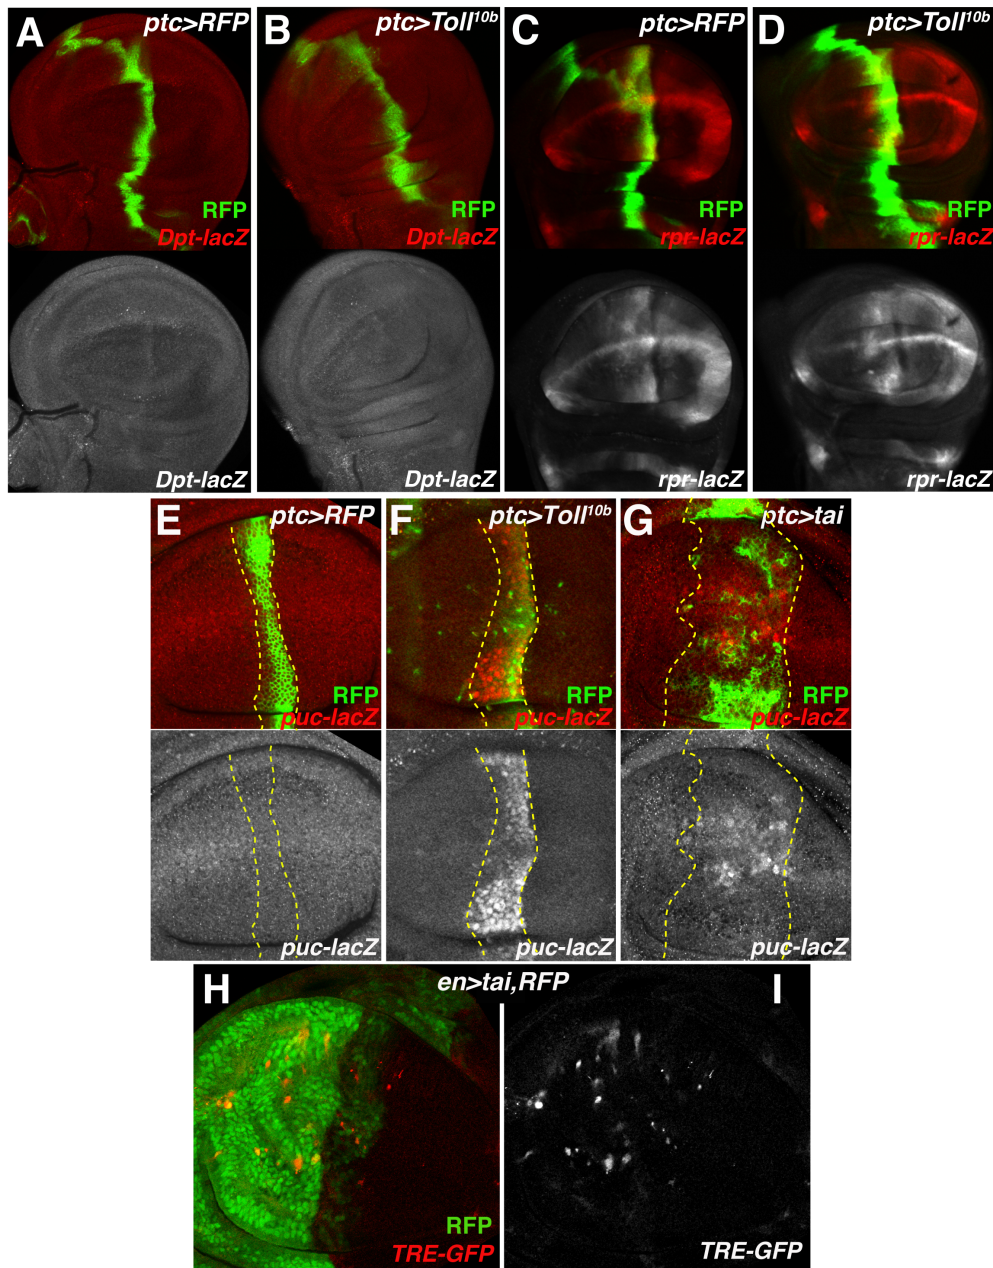

**Figure S6. Effects of *Toll*<sup>10b</sup> and *tai* on transcriptional reporters in L3 wing disc cells. Related to Figure 7.** *Dpt-LacZ* (A-B) and *rpr-lacZ* (C-D) expression in (A,C) *ptc>RFP* control and (B,D) *ptc>Toll*<sup>10b</sup> L3 wing discs. *puc-lacZ* expression in (E) *ptc>GFP* control, (F) *ptc>UAS-Toll*<sup>10b</sup>, *GFP*, (G) *ptc>tai*, *GFP* L3 wing discs. Note induction of *puc-lacZ* in *tai*-expressing cells in the center of the pouch. (H) *Tre-GFP-16* expression in *en>tai, RFP* discs. RFP is false-colored green and GFP is false-colored red.

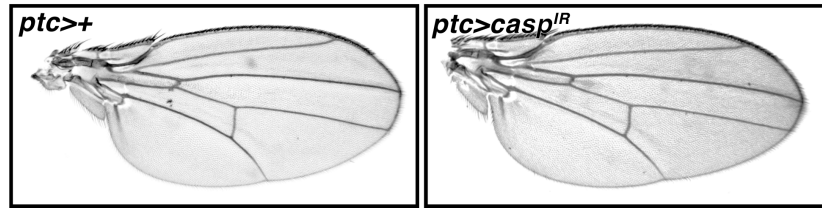

**Figure S7.** The effect of *ptc-Gal4* driven expression of *casp*<sup>IR</sup> on adult wing development. Related to Figure 7. Adult wings of *ptc>Gal4* control and *ptc>casp*<sup>IR</sup>.

| Suppressors           | Strength  | Gene(s) confirmed for effect |
|-----------------------|-----------|------------------------------|
| <i>Df(2R)Exel6061</i> | +++       | -                            |
| <i>Df(2R)Exel6069</i> |           | -                            |
| <i>Df(2R)BSC152</i>   |           | -                            |
| <i>Df(2L)BSC169</i>   |           | -                            |
| <i>Df(2L)BSC180</i>   |           | -                            |
| <i>Df(2R)BSC199</i>   |           | -                            |
| <i>Df(2L)BSC278</i>   |           | <i>cact</i>                  |
| <i>Df(2L)BSC291</i>   |           | <i>pvf2, pvf3</i>            |
| <i>Df(2R)BSC595</i>   |           | -                            |
| <i>Df(2R)BSC661</i>   |           | -                            |
| <i>Df(2L)Exel7011</i> |           | -                            |
| <i>Df(2R)Exel7131</i> |           | -                            |
| <i>Df(2R)Exel7144</i> |           | -                            |
| <i>Df(2R)Exel7162</i> | -         |                              |
| <i>Df(2L)BSC109</i>   | ++        | -                            |
| <i>Df(2R)BSC161</i>   |           | -                            |
| <i>Df(2R)BSC280</i>   |           | <i>myd88</i>                 |
| <i>Df(2R)BSC383</i>   |           | -                            |
| <i>Df(2L)Exel6038</i> |           | -                            |
| <i>Df(2R)Exel6284</i> |           | -                            |
| <i>Df(2L)Exel7034</i> | -         |                              |
| <i>Df(2R)BSC135</i>   | -         |                              |
| <i>Df(2L)BSC148</i>   | <i>dl</i> |                              |
| <i>Df(2L)BSC149</i>   | -         |                              |
| <i>Df(2L)BSC172</i>   | -         |                              |
| <i>Df(2L)BSC188</i>   | +         | -                            |
| <i>Df(2R)BSC274</i>   |           | -                            |
| <i>Df(2L)BSC277</i>   |           | -                            |
| <i>Df(2R)BSC267</i>   |           | -                            |
| <i>Df(2R)BSC331</i>   |           | -                            |
| <i>Df(2R)BSC485</i>   |           | -                            |
| <i>Df(2R)BSC550</i>   |           | -                            |
| <b>Enhancers</b>      |           | <b>Strength</b>              |
| <i>Df(2L)C144</i>     | +++       | -                            |
| <i>Df(2R)M60E</i>     |           | -                            |
| <i>Df(2L)BSC6</i>     |           | -                            |
| <i>Df(2L)ED19</i>     |           | -                            |
| <i>Df(2R)ED2457</i>   |           | -                            |
| <i>Df(2R)ED1715</i>   |           | -                            |
| <i>Df(2R)ED3728</i>   |           | <i>hpo</i>                   |
| <i>Df(2L)ED105</i>    |           | <i>ds</i>                    |
| <i>Df(2R)BSC630</i>   |           | -                            |

**Table S1. Deficiencies that dominantly modify *tai*-driven wing invasion. Related to Figures 2, 3, and 5.** Table of BDSC or Exelixis deficiency (*Df*) stocks that dominantly modify the *MS1096>tai* phenotype. Strength of modification: +++ strong, ++ moderate, +mild. Where noted in column 3, suppressive effects were mapped to specific genes using available alleles.

| REAGENT or RESOURCE                                                                | SOURCE                         | IDENTIFIER |
|------------------------------------------------------------------------------------|--------------------------------|------------|
| Primer pair for <i>spz</i> :<br>GGAAGCTGGTGTACCCAAA,<br>GTCCAGTTCGCCATCACTT        | Integrated DNA<br>Technologies | N/A        |
| Primer pair for <i>spz4</i> :<br>CACAGTTGGGGCTTCGTAAT,<br>GATGCGGGTGAGTACTTGGT     | Integrated DNA<br>Technologies | N/A        |
| Primer pair for <i>spz6</i> :<br>TTCAGGCACGCTGTCACTAC,<br>TGCCCTCTTCTGCAGGTACT     | Integrated DNA<br>Technologies | N/A        |
| Primer pair for <i>cht5</i> :<br>CCAGTCCCTGTTCCAAGTGT,<br>ATCTCGTTGGGATCGAACTG     | Integrated DNA<br>Technologies | N/A        |
| Primer pair for <i>cht6</i> :<br>TCAGCGAAGCTTCAGAGACA,<br>CAATTTTCAATGCCCTCGT      | Integrated DNA<br>Technologies | N/A        |
| Primer pair for <i>PGRP-LD</i> :<br>TCGGCACACTGAACTTCTTG,<br>TCTTCCAGCGAAGAAGGAAA  | Integrated DNA<br>Technologies | N/A        |
| Primer pair for <i>PGRP-LC</i> :<br>GCTCAACGATTTCGAAATTGG,<br>GGGCGGTACATTATTTTCGT | Integrated DNA<br>Technologies | N/A        |
| Primer pair for <i>tai</i> :<br>CTCCGTTTGGCTCTAACTCG,<br>TGTTGTTGCAGCGTTCTACC      | Integrated DNA<br>Technologies | N/A        |
| Primer pair for <i>rpr</i> :<br>ACGGGGAAAACCAATAGTCC,<br>TGGCTCTGTGTCCTTGACTG      | Integrated DNA<br>Technologies | N/A        |
| Primer pair for <i>hid</i> :<br>CTAAAACGCTTGGCGAACTT,<br>CCCAAAAATCGCATTGATCT      | Integrated DNA<br>Technologies | N/A        |
| Primer pair for <i>puc</i> :<br>GTTTCTGAAGCCACCTCTGC,<br>GTTTTGCTTTGTGGTTGGT       | Integrated DNA<br>Technologies | N/A        |
| Primer pair for <i>rp49</i> :<br>CGGATCGATATGCTAAGCTGT,<br>GCGCTTGTTGATCCGTA       | Integrated DNA<br>Technologies | N/A        |
| Primer pair for <i>edg78e</i> :<br>GCGGCCAGTCATTGTTATTT.<br>CATCCGCTGAAATTTGTTT    | Integrated DNA<br>Technologies | N/A        |
| Primer pair for <i>cpr100A</i> :<br>AAGTTCGGAGCTGCCTATGA,<br>GGCAAGTGATCTCCAGAAGC  | Integrated DNA<br>Technologies | N/A        |
| Primer pair for <i>ftz-fl</i> :<br>TGATCGACTTCAAGCACCTG,<br>CTCGAGGCACTTCTGGAATC   | Integrated DNA<br>Technologies | N/A        |
| Primer pair for <i>dilp8</i> :<br>GCTGGTCATCGGAGTCTGTT,<br>TAGCTGCTTCGGCTGATGT     | Integrated DNA<br>Technologies | N/A        |

**Table S4. Sequences of DNA primers for qPCR. Related to Figure 3.** Pairs of DNA sequences (listed 5'-to-3') used to assay expression levels of the corresponding mRNAs.

## Supplemental Reference

S1. Colombani, J., Andersen, D.S., and Leopold, P. (2012). Secreted peptide Dilp8 coordinates *Drosophila* tissue growth with developmental timing. *Science* 336, 582-585.
